# Supplementary material
Source: PubMed Central journal article supplement (PMC3263959)
Supplement: supp_111.187104_JPET187104_SupplementalData.pdf [file supp_111.187104_JPET187104_SupplementalData.pdf]

**Roscovitine inhibits CaV3.1 (T-type) channels by preferentially affecting close-state inactivation.**

Viktor Yarotsky and Keith S. Elmslie

Journal of Pharmacology and Experimental Therapeutics

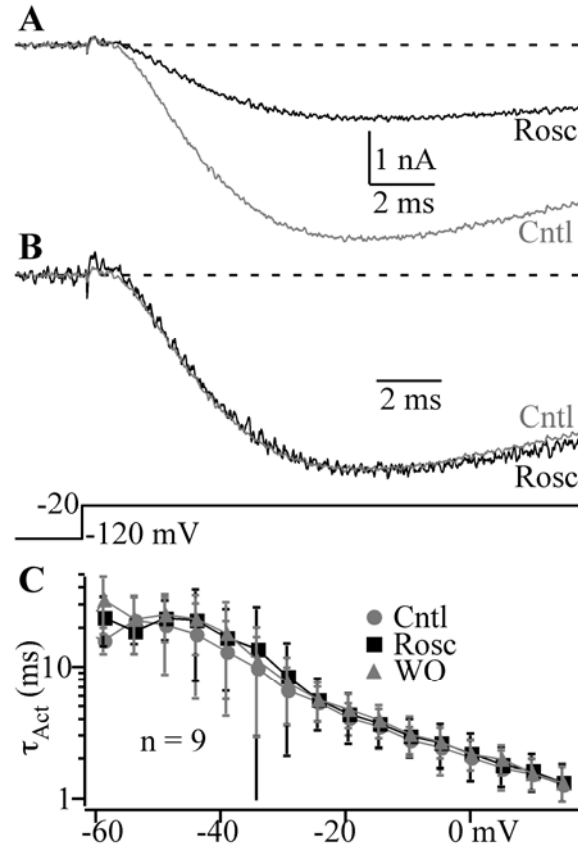

**Supplemental Figure 1 – Roscovitine fails to affect CaV3.1 activation kinetics.** **A**, CaV3.1 currents activated by a step to -20 mV are shown in control (Cntl, gray trace) and 45  $\mu$ M roscovitine (Rosc, black trace). **B**, The traces in panel A were normalized to peak to highlight the absence of an effect of roscovitine on activation kinetics. **C**, CaV3.1 current activation was fit using a single exponential equation to determine the activation

$\tau$  ( $\tau_{Act}$ ). The fit was constrained to the activating portion of the current that was 0.3 ms following the onset of the voltage step to the peak. Data are mean  $\pm$  SD from control (gray circle), 45  $\mu$ M roscovitine (black square) and washout (gray triangle). There were no significant differences between roscovitine and control (average of Cntl and WO data).
